# Supplementary material for: HLA-B*57 and B*58 Associate with Predictors of Reservoir Size in an Acutely Treated HIV Cohort
Source: PubMed Central journal article supplement (PMC9986004; doi:10.1089/aid.2022.0082), 2023-03-03
Supplement: Suppl_FigS1.pdf [file Suppl_FigS1.pdf]

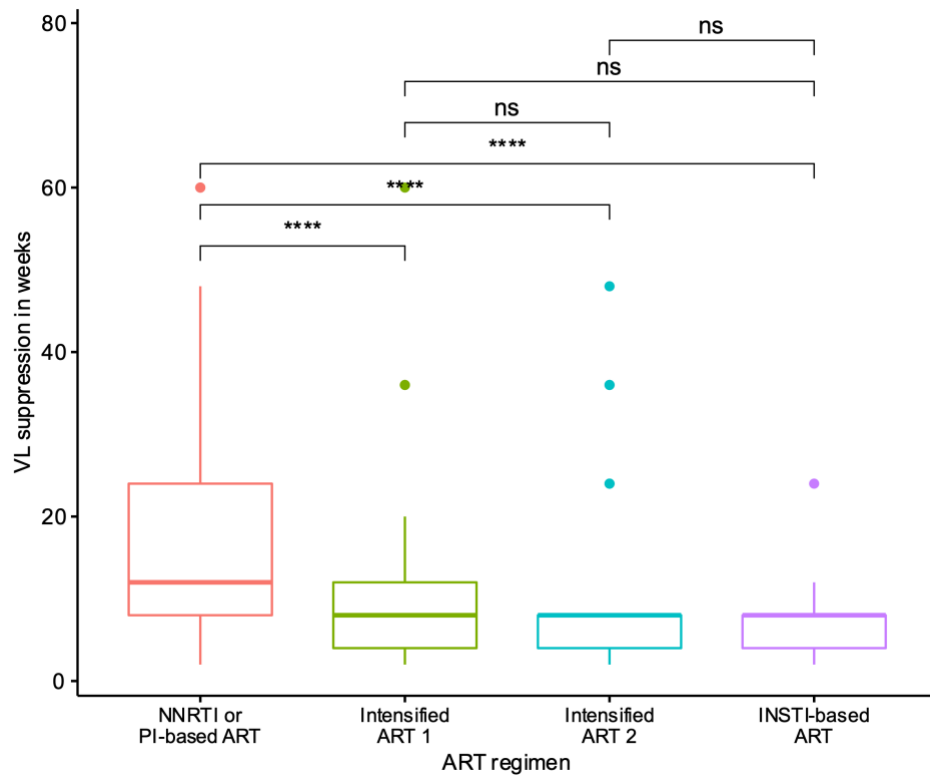

**Supplementary Figure 1. Significant differences in VL suppression were identified based on the ART regimen.** Non-nucleoside reverse transcriptase inhibitors (NNRTI), Protease Inhibitor (PI), Intensified ART 1 (efavirenz/maraviroc/raltegravir-based), Intensified ART 2 (dolutegravir/maraviroc-based), Integrase strand transfer Inhibitor (INSTI). ns: not significant, \*\*\*\* p < 0.0001.
