# Supplementary material for: HLA-B*57 and B*58 Associate with Predictors of Reservoir Size in an Acutely Treated HIV Cohort
Source: PubMed Central journal article supplement (PMC9986004; doi:10.1089/aid.2022.0082), 2023-03-03
Supplement: Suppl_FigS2.pdf [file Suppl_FigS2.pdf]

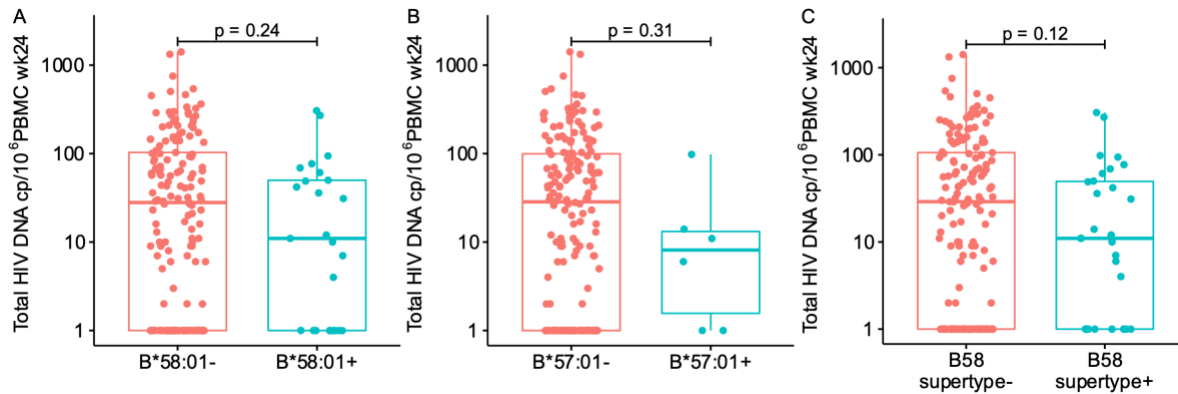

**Supplementary Figure 2. No significant differences observed in HIV DNA levels in the presence of specific HLA alleles.** Although not significant a trend towards statistical significance was observed when comparing presence of specific HLA alleles or combination with HIV reservoir size (N = 192). A) HLA-B\*58 and B) HLA-B\*57. C) HLA-B58 superotype. Statistical significance was determined by Mann-Whitney U test.
