# Supplementary material for: HLA-B*57 and B*58 Associate with Predictors of Reservoir Size in an Acutely Treated HIV Cohort
Source: PubMed Central journal article supplement (PMC9986004; doi:10.1089/aid.2022.0082), 2023-03-03
Supplement: Suppl_TableS1.pdf [file Suppl_TableS1.pdf]

Supplementary Table 1. Association of HLA alleles with time to VL suppression after ART initiation (N = 526)

| HLA Allele     | N (%)           | OR          | 95% CI              | P value (q value*)       |
|----------------|-----------------|-------------|---------------------|--------------------------|
| A*02           | 253 (48)        | 0.96        | (0.62, 1.5)         | 0.86 (0.97)              |
| A*02:01        | 55 (10)         | 1.1         | (0.52, 2.31)        | 0.8 (0.97)               |
| A*02:03        | 96 (18)         | 0.88        | (0.5, 1.54)         | 0.65 (0.94)              |
| A*02:07        | 97 (18)         | 1.66        | (0.92, 2.99)        | 0.09 (0.27)              |
| A*11           | 263 (50)        | 1.43        | (0.91, 2.24)        | 0.12 (0.29)              |
| A*11:01        | 245 (47)        | 1.38        | (0.88, 2.16)        | 0.17 (0.37)              |
| A*24           | 163 (31)        | 1.26        | (0.77, 2.05)        | 0.36 (0.69)              |
| A*24:02        | 101 (19)        | 0.83        | (0.47, 1.45)        | 0.51 (0.83)              |
| <b>A*33:03</b> | <b>146 (28)</b> | <b>0.47</b> | <b>(0.29, 0.78)</b> | <b>0.003 (0.03)</b>      |
| B*13           | 83 (16)         | 1.19        | (0.63, 2.26)        | 0.59 (0.9)               |
| B*13:01        | 70 (13)         | 1.44        | (0.72, 2.88)        | 0.3 (0.63)               |
| B*15           | 146 (28)        | 1.22        | (0.74, 2.02)        | 0.44 (0.75)              |
| B*15:02        | 83 (16)         | 1.11        | (0.6, 2.07)         | 0.74 (0.97)              |
| B*18           | 57 (11)         | 1.37        | (0.68, 2.77)        | 0.38 (0.69)              |
| B*40           | 104 (20)        | 1.63        | (0.91, 2.9)         | 0.1 (0.27)               |
| B*40:01        | 73 (14)         | 1.84        | (0.94, 3.6)         | 0.08 (0.27)              |
| B*46:01        | 139 (26)        | 1.67        | (1, 2.78)           | 0.05 (0.24)              |
| B*51           | 54 (10)         | 0.9         | (0.42, 1.95)        | 0.79 (0.97)              |
| <b>B*58:01</b> | <b>87 (17)</b>  | <b>0.26</b> | <b>(0.14, 0.49)</b> | <b>2.53E-05 (0.0004)</b> |
| C*01           | 168 (32)        | 1.61        | (0.99, 2.63)        | 0.06 (0.24)              |
| C*01:02        | 168 (32)        | 1.61        | (0.99, 2.63)        | 0.06 (0.24)              |
| C*03           | 191 (36)        | 0.61        | (0.38, 0.98)        | 0.04 (0.24)              |
| <b>C*03:02</b> | <b>88 (17)</b>  | <b>0.27</b> | <b>(0.14, 0.5)</b>  | <b>2.72E-05 (0.0004)</b> |
| C*03:04        | 88 (17)         | 1.68        | (0.91, 3.11)        | 0.1 (0.27)               |
| C*04           | 95 (18)         | 1.06        | (0.59, 1.88)        | 0.86 (0.97)              |
| C*07           | 251 (48)        | 0.99        | (0.63, 1.55)        | 0.97 (0.97)              |
| C*07:02        | 159 (30)        | 0.98        | (0.61, 1.6)         | 0.95 (0.97)              |
| C*08           | 101 (19)        | 0.98        | (0.56, 1.72)        | 0.95 (0.97)              |
| C*08:01        | 100 (19)        | 0.98        | (0.56, 1.72)        | 0.94 (0.97)              |

\*q value was adjusted for multiple comparisons (29 HLA class I alleles). Age, sex, Fiebig stage, pre-ART VL, CD4 counts and ART regimen were adjusted in the model.
