# Supplementary material for: HLA-B*57 and B*58 Associate with Predictors of Reservoir Size in an Acutely Treated HIV Cohort
Source: PubMed Central journal article supplement (PMC9986004; doi:10.1089/aid.2022.0082), 2023-03-03
Supplement: Suppl_TableS2.pdf [file Suppl_TableS2.pdf]

Supplemental Table 2. Association of HLA alleles with Pre-ART VL (N = 526)

| HLA Allele | N (%)    | Beta   | 95% CI         | P value (q value*) |
|------------|----------|--------|----------------|--------------------|
| A*02       | 253 (48) | -0.11  | (-0.25, 0.03)  | 0.12 (0.63)        |
| A*02:01    | 55 (10)  | -0.12  | (-0.35, 0.12)  | 0.32 (0.78)        |
| A*02:03    | 96 (18)  | -0.11  | (-0.29, 0.08)  | 0.26 (0.74)        |
| A*02:07    | 97 (18)  | -0.01  | (-0.19, 0.17)  | 0.93 (0.98)        |
| A*11       | 263 (50) | 0.17   | (0.02, 0.31)   | 0.02 (0.27)        |
| A*11:01    | 245 (47) | 0.16   | (0.02, 0.3)    | 0.03 (0.27)        |
| A*24       | 163 (31) | -0.05  | (-0.2, 0.11)   | 0.57 (0.98)        |
| A*24:02    | 101 (19) | -0.002 | (-0.18, 0.18)  | 0.98 (0.98)        |
| A*33:03    | 146 (28) | -0.1   | (-0.26, 0.06)  | 0.21 (0.74)        |
| B*13       | 83 (16)  | -0.02  | (-0.22, 0.17)  | 0.82 (0.98)        |
| B*13:01    | 70 (13)  | -0.005 | (-0.22, 0.21)  | 0.96 (0.98)        |
| B*15       | 146 (28) | -0.18  | (-0.34, -0.02) | 0.03 (0.27)        |
| B*15:02    | 83 (16)  | -0.07  | (-0.27, 0.12)  | 0.47 (0.98)        |
| B*18       | 57 (11)  | 0.02   | (-0.21, 0.25)  | 0.88 (0.98)        |
| B*40       | 104 (20) | -0.01  | (-0.19, 0.17)  | 0.9 (0.98)         |
| B*40:01    | 73 (14)  | -0.004 | (-0.21, 0.2)   | 0.97 (0.98)        |
| B*46:01    | 139 (26) | -0.02  | (-0.19, 0.14)  | 0.77 (0.98)        |
| B*51       | 54 (10)  | 0.18   | (-0.05, 0.42)  | 0.13 (0.63)        |
| B*58:01    | 87 (17)  | -0.05  | (-0.24, 0.14)  | 0.6 (0.98)         |
| C*01       | 168 (32) | -0.02  | (-0.17, 0.13)  | 0.81 (0.98)        |
| C*01:02    | 168 (32) | -0.02  | (-0.17, 0.13)  | 0.81 (0.98)        |
| C*03       | 191 (36) | -0.03  | (-0.18, 0.12)  | 0.7 (0.98)         |
| C*03:02    | 88 (17)  | -0.06  | (-0.25, 0.13)  | 0.51 (0.98)        |
| C*03:04    | 88 (17)  | 0.03   | (-0.16, 0.22)  | 0.73 (0.98)        |
| C*04       | 95 (18)  | -0.16  | (-0.34, 0.02)  | 0.09 (0.63)        |
| C*07       | 251 (48) | 0.09   | (-0.06, 0.23)  | 0.24 (0.74)        |
| C*07:02    | 159 (30) | 0.04   | (-0.11, 0.2)   | 0.6 (0.98)         |
| C*08       | 101 (19) | -0.1   | (-0.28, 0.08)  | 0.28 (0.74)        |
| C*08:01    | 100 (19) | -0.12  | (-0.3, 0.06)   | 0.19 (0.74)        |

\*q value was adjusted for multiple comparisons (29 common HLA class I alleles). Age, sex, Fiebig stage and pre-ART CD4 counts were adjusted in each regression model.
