# Supplementary material for: HLA-B*57 and B*58 Associate with Predictors of Reservoir Size in an Acutely Treated HIV Cohort
Source: PubMed Central journal article supplement (PMC9986004; doi:10.1089/aid.2022.0082), 2023-03-03
Supplement: Suppl_TableS3.pdf [file Suppl_TableS3.pdf]

Supplementary Table 3. Association of HLA alleles with time to CD4 reconstitution after ART initiation (N = 526)

| HLA Allele | N (%)    | OR   | 95% CI       | P value (q value*) |
|------------|----------|------|--------------|--------------------|
| A*02       | 253 (48) | 1.22 | (0.79, 1.88) | 0.38 (0.67)        |
| A*02:01    | 55 (10)  | 0.61 | (0.32, 1.16) | 0.13 (0.67)        |
| A*02:03    | 96 (18)  | 1.46 | (0.8, 2.66)  | 0.21 (0.67)        |
| A*02:07    | 97 (18)  | 1.25 | (0.71, 2.21) | 0.44 (0.68)        |
| A*11       | 263 (50) | 0.76 | (0.49, 1.18) | 0.22 (0.67)        |
| A*11:01    | 245 (47) | 0.68 | (0.43, 1.06) | 0.09 (0.67)        |
| A*24       | 163 (31) | 1.24 | (0.76, 2.01) | 0.39 (0.67)        |
| A*24:02    | 101 (19) | 1.43 | (0.79, 2.59) | 0.24 (0.67)        |
| A*33:03    | 146 (28) | 1.17 | (0.72, 1.92) | 0.52 (0.71)        |
| B*13       | 83 (16)  | 1.07 | (0.58, 1.95) | 0.84 (0.9)         |
| B*13:01    | 70 (13)  | 1.43 | (0.72, 2.83) | 0.31 (0.67)        |
| B*15       | 146 (28) | 1.01 | (0.62, 1.64) | 0.96 (0.96)        |
| B*15:02    | 83 (16)  | 0.8  | (0.45, 1.42) | 0.44 (0.68)        |
| B*18       | 57 (11)  | 1.66 | (0.76, 3.62) | 0.21 (0.67)        |
| B*40       | 104 (20) | 1.03 | (0.6, 1.78)  | 0.91 (0.95)        |
| B*40:01    | 73 (14)  | 0.9  | (0.49, 1.67) | 0.74 (0.82)        |
| B*46:01    | 139 (26) | 1.55 | (0.92, 2.6)  | 0.1 (0.67)         |
| B*51       | 54 (10)  | 1.18 | (0.55, 2.53) | 0.67 (0.8)         |
| B*58:01    | 87 (17)  | 1.36 | (0.74, 2.49) | 0.33 (0.67)        |
| C*01       | 168 (32) | 1.44 | (0.89, 2.32) | 0.14 (0.67)        |
| C*01:02    | 168 (32) | 1.44 | (0.89, 2.32) | 0.14 (0.67)        |
| C*03       | 191 (36) | 1.26 | (0.79, 1.98) | 0.33 (0.67)        |
| C*03:02    | 88 (17)  | 1.36 | (0.74, 2.49) | 0.32 (0.67)        |
| C*03:04    | 88 (17)  | 1.18 | (0.65, 2.16) | 0.58 (0.74)        |
| C*04       | 95 (18)  | 0.79 | (0.46, 1.36) | 0.39 (0.67)        |
| C*07       | 251 (48) | 0.92 | (0.59, 1.42) | 0.69 (0.8)         |
| C*07:02    | 159 (30) | 0.86 | (0.54, 1.37) | 0.52 (0.71)        |
| C*08       | 101 (19) | 0.79 | (0.46, 1.36) | 0.39 (0.67)        |
| C*08:01    | 100 (19) | 0.84 | (0.49, 1.46) | 0.54 (0.71)        |

\*q value was adjusted for multiple comparisons (29 HLA class I alleles). Age, sex, Fiebig stage, pre-ART VL were adjusted in the model.
