# Supplementary material for: HLA-B*57 and B*58 Associate with Predictors of Reservoir Size in an Acutely Treated HIV Cohort
Source: PubMed Central journal article supplement (PMC9986004; doi:10.1089/aid.2022.0082), 2023-03-03
Supplement: Suppl_TableS4.pdf [file Suppl_TableS4.pdf]

Supplemental Table 4. Additional HLA analyses of low frequency (<5%) alleles (N = 526)

| Outcome                | HLA Allele | N (%)  | OR   | 95% CI       | P value     |
|------------------------|------------|--------|------|--------------|-------------|
| Time to VL suppression | B*57       | 11 (2) | 0.07 | (0.01, 0.64) | <b>0.02</b> |
|                        | B*35 (px)  | 9 (2)  | 0.56 | (0.12, 2.52) | 0.45        |

Covariates: age, sex, Fiebig stage, pre-ART VL, CD4 counts and ART regimen
